# Supplementary material for: High expression of bone morphogenetic protein (BMP) 6 and BMP7 are associated with higher immune cell infiltration and better survival in estrogen receptor-positive breast cancer
Source: PubMed Central journal article supplement — Oncol Rep. 2019 Aug 12;42(4):1413–21. doi: 10.3892/or.2019.7275 (PMC6718975; doi:10.3892/or.2019.7275), 2019-08-12
Supplement: Supplementary_Data.pdf [file Supplementary_Data.pdf]

Figure S1. BMPs that have no association with OS of breast cancer patients in TCGA. (A) The associations of BMP expression with OS. (B) Gene expression comparison between tumor and adjacent normal tissues in matched pairs of TCGA breast cancer. BMP, bone morphogenetic protein; OS, overall survival; TCGA, The Cancer Genome Atlas.

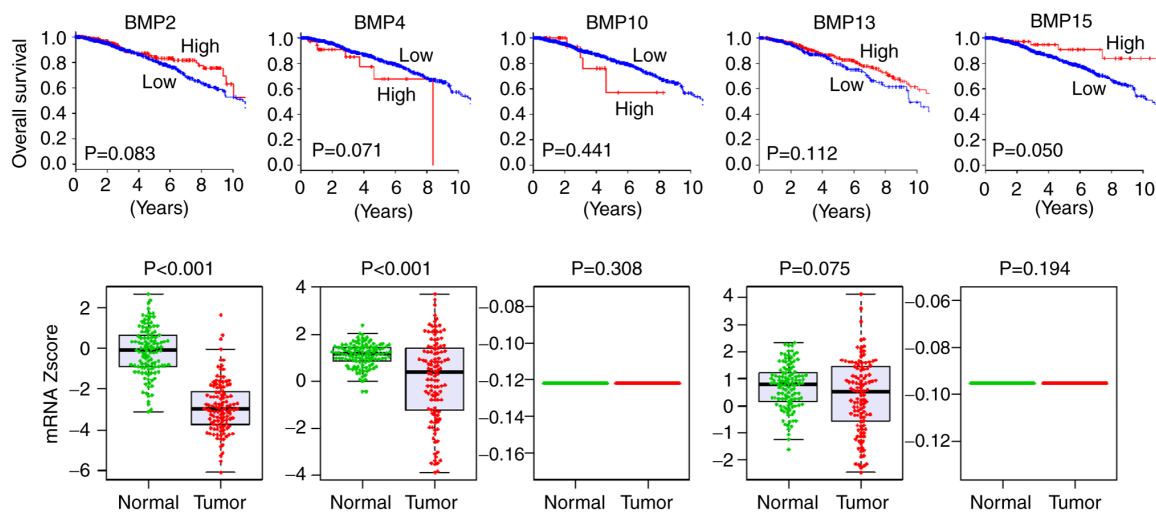

Figure S2. Infiltrating immune cell comparison between the BMP7 high and low ER<sup>+</sup> tumors. BMP, bone morphogenetic protein; ER<sup>+</sup>, ER-positive.

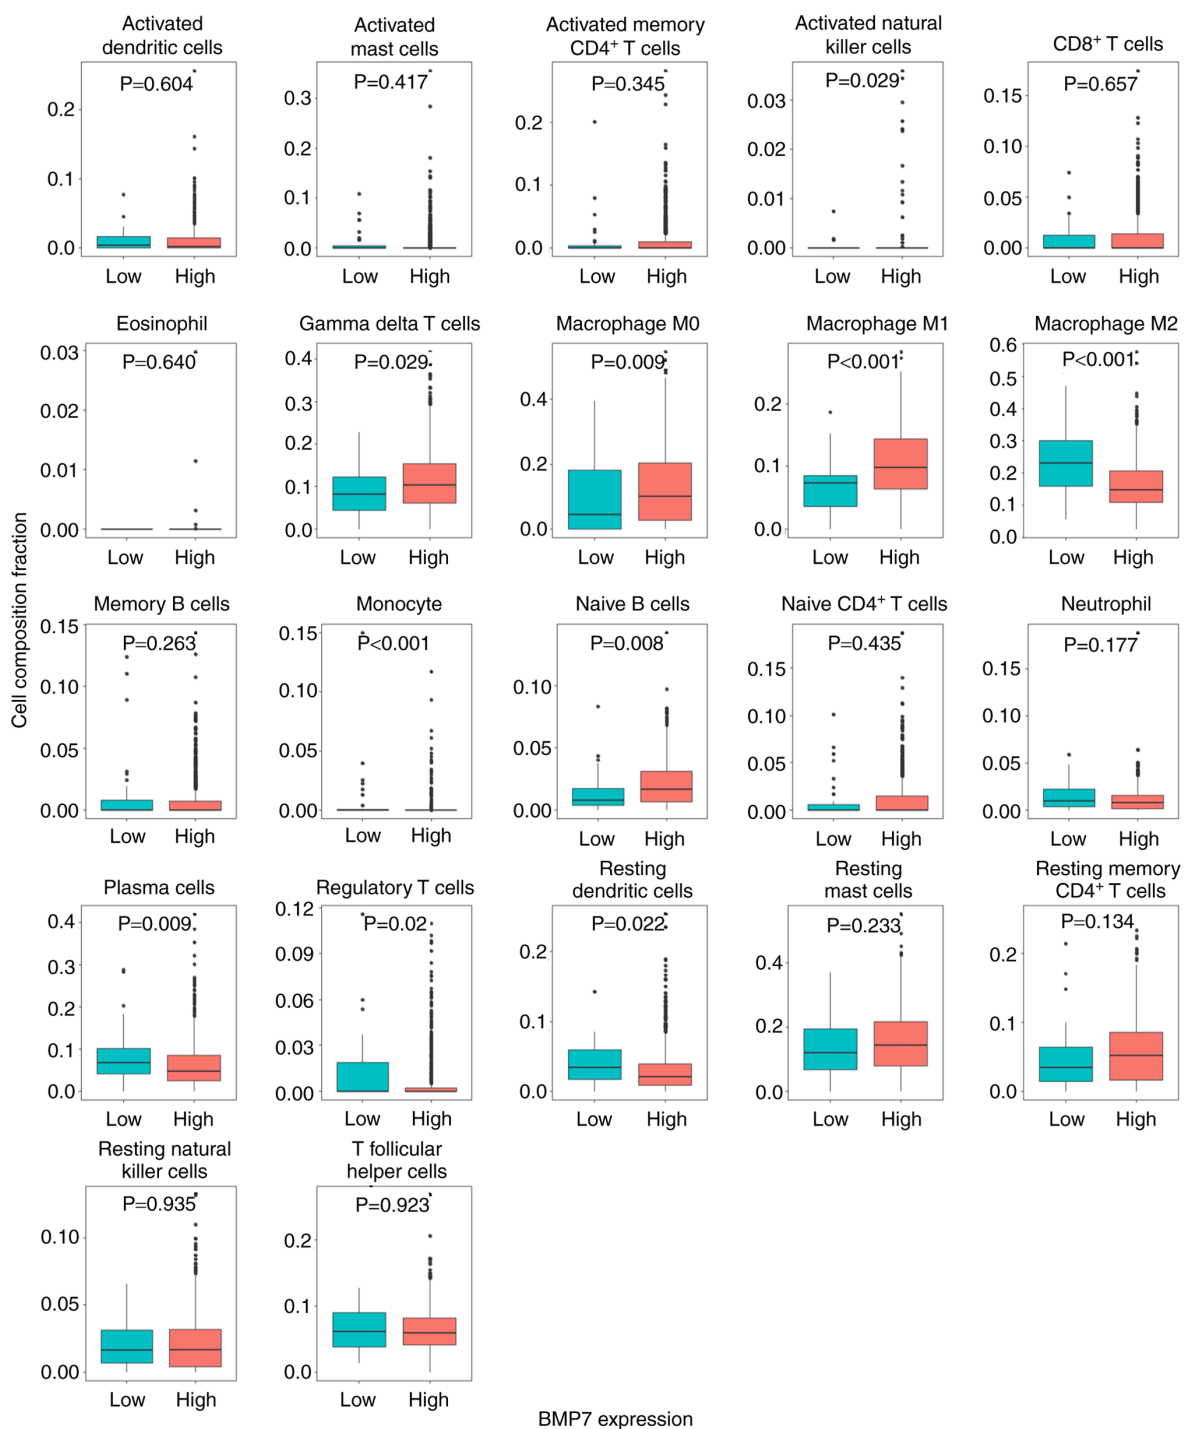

Figure S3. Infiltrating immune cell comparison between the BMP6 high and low ER<sup>+</sup> tumors. BMP, bone morphogenetic protein; ER<sup>+</sup>, ER-positive.

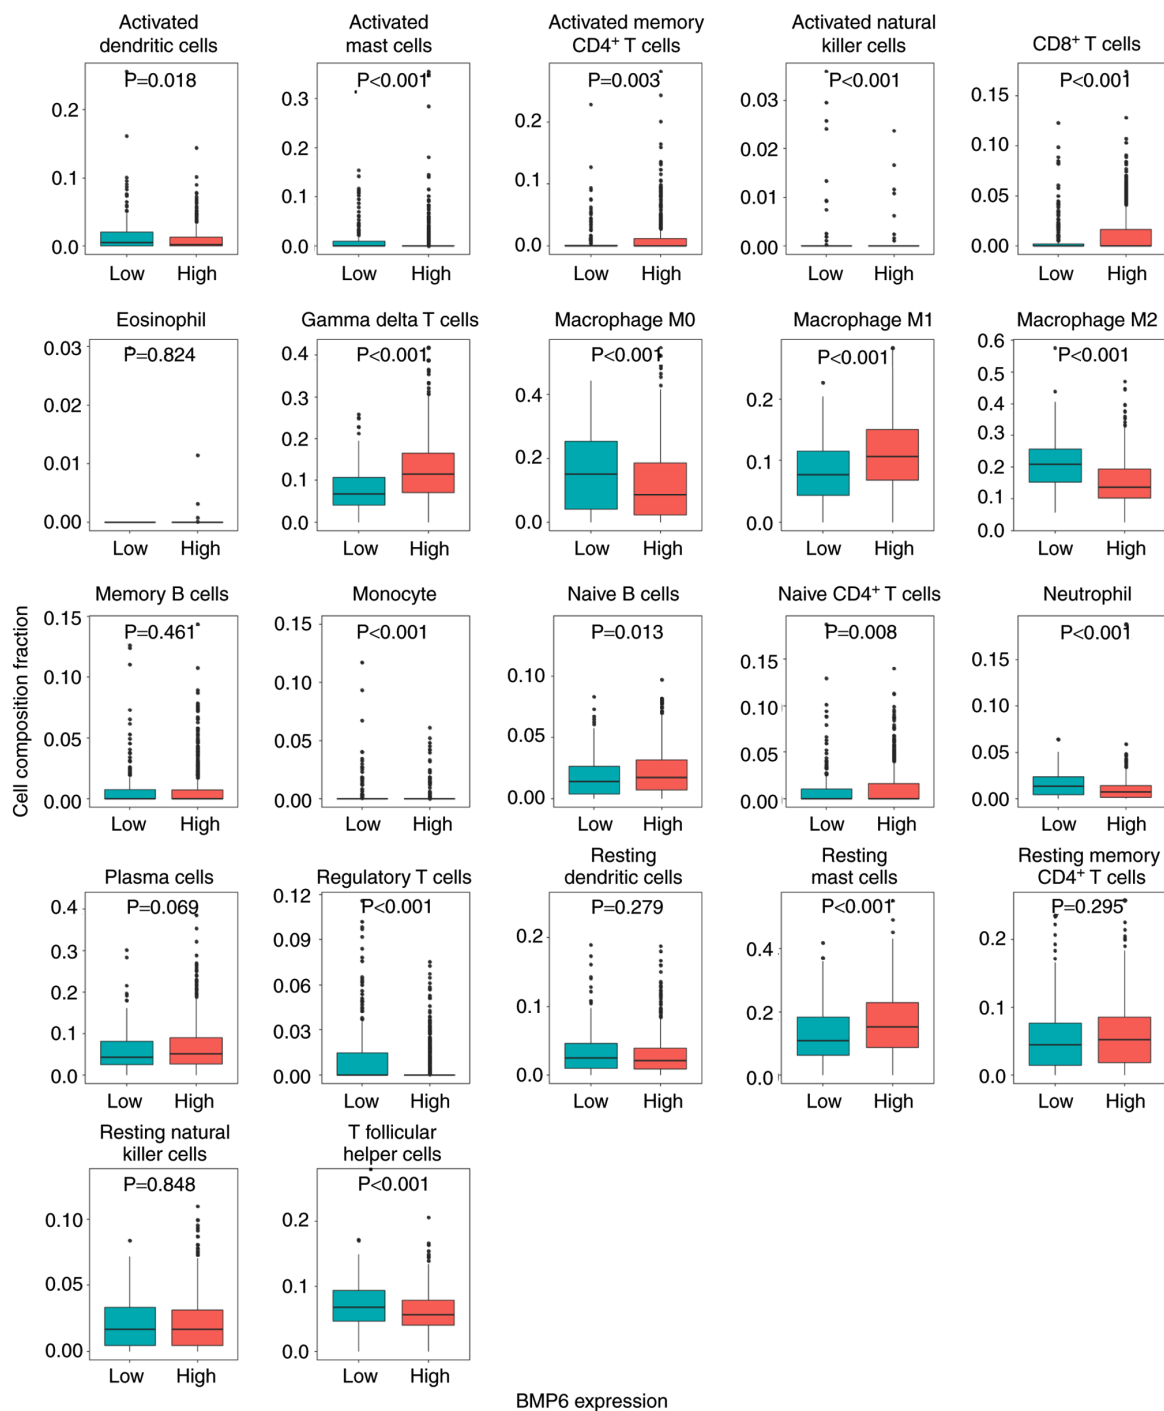

Table SI. Hallmark gene sets enriched in the BMP7 high ER<sup>+</sup> tumors.

| NAME                                       | SIZE | ES       | NES      | P-value |
|--------------------------------------------|------|----------|----------|---------|
| HALLMARK_EPITHELIAL_MESENCHYMAL_TRANSITION | 195  | 0.81539  | 2.376158 | <0.001  |
| HALLMARK_APICAL_JUNCTION                   | 198  | 0.647673 | 2.311165 | <0.001  |
| HALLMARK_TGF_BETA_SIGNALING                | 54   | 0.671326 | 2.210063 | <0.001  |
| HALLMARK_INFLAMMATORY_RESPONSE             | 197  | 0.680065 | 2.060358 | <0.001  |
| HALLMARK_IL2_STAT5_SIGNALING               | 197  | 0.57649  | 2.054061 | <0.001  |
| HALLMARK_TNFA_SIGNALING_VIA_NFKB           | 197  | 0.678327 | 2.039314 | <0.001  |
| HALLMARK_APOPTOSIS                         | 158  | 0.525642 | 2.031495 | <0.001  |
| HALLMARK_UV_RESPONSE_DN                    | 142  | 0.579119 | 1.990315 | <0.001  |
| HALLMARK_KRAS_SIGNALING_UP                 | 191  | 0.617549 | 1.915935 | <0.001  |
| HALLMARK_ANGIOGENESIS                      | 36   | 0.693166 | 1.866302 | <0.001  |
| HALLMARK_HYPOXIA                           | 196  | 0.546198 | 1.865337 | <0.001  |
| HALLMARK_COAGULATION                       | 135  | 0.624235 | 1.844726 | <0.001  |
| HALLMARK_IL6_JAK_STAT3_SIGNALING           | 83   | 0.633065 | 1.841464 | <0.001  |
| HALLMARK_P53_PATHWAY                       | 199  | 0.469798 | 1.791799 | <0.001  |
| HALLMARK_APICAL_SURFACE                    | 44   | 0.576014 | 1.705311 | 0.001   |
| HALLMARK_COMPLEMENT                        | 194  | 0.568917 | 1.862521 | 0.001   |
| HALLMARK_ALLOGRAFT_REJECTION               | 191  | 0.668578 | 1.918512 | 0.003   |
| HALLMARK_INTERFERON_GAMMA_RESPONSE         | 192  | 0.659769 | 1.897822 | 0.005   |
| HALLMARK_NOTCH_SIGNALING                   | 32   | 0.543718 | 1.740645 | 0.007   |
| HALLMARK_PI3K_AKT_MTOR_SIGNALING           | 105  | 0.396568 | 1.587435 | 0.015   |
| HALLMARK_MYOGENESIS                        | 199  | 0.506531 | 1.505736 | 0.018   |

ER<sup>+</sup>, estrogen receptor-positive; ES, enrichment score; NES, normalized enrichment score.

Table SII. Hallmark gene sets enriched in the BMP7 high ER<sup>-</sup> tumors.

| NAME                                | SIZE | ES       | NES      | P-value |
|-------------------------------------|------|----------|----------|---------|
| HALLMARK_WNT_BETA_CATENIN_SIGNALING | 42   | 0.434099 | 1.571727 | 0.024   |
| HALLMARK_NOTCH_SIGNALING            | 32   | 0.398375 | 1.449805 | 0.039   |

ER<sup>-</sup>, estrogen receptor-negative; ES, enrichment score; NES, normalized enrichment score.

Table SIII. Hallmark gene sets enriched in the BMP7 low ER<sup>-</sup> tumors.

| NAME                             | SIZE | ES       | NES      | P-value |
|----------------------------------|------|----------|----------|---------|
| HALLMARK_ANDROGEN_RESPONSE       | 98   | -0.53563 | -2.02248 | 0.002   |
| HALLMARK_BILE_ACID_METABOLISM    | 112  | -0.40396 | -1.61658 | 0.021   |
| HALLMARK_PROTEIN_SECRETION       | 95   | -0.48222 | -1.72896 | 0.028   |
| HALLMARK_CHOLESTEROL_HOMEOSTASIS | 73   | -0.44082 | -1.63514 | 0.030   |

ER<sup>-</sup>, estrogen receptor-negative; ES, enrichment score; NES, normalized enrichment score.

Table SIV. Hallmark gene sets enriched in the BMP6 high ER<sup>+</sup> tumors.

| NAME                                       | SIZE | ES       | NES      | P-value |
|--------------------------------------------|------|----------|----------|---------|
| HALLMARK_IL2_STAT5_SIGNALING               | 197  | 0.63789  | 2.485591 | <0.001  |
| HALLMARK_KRAS_SIGNALING_UP                 | 191  | 0.664757 | 2.424568 | <0.001  |
| HALLMARK_INFLAMMATORY_RESPONSE             | 197  | 0.688708 | 2.306533 | <0.001  |
| HALLMARK_COMPLEMENT                        | 194  | 0.620603 | 2.289384 | <0.001  |
| HALLMARK_TNFA_SIGNALING_VIA_NFKB           | 197  | 0.693867 | 2.283025 | <0.001  |
| HALLMARK_APICAL_JUNCTION                   | 198  | 0.575342 | 2.278082 | <0.001  |
| HALLMARK_APOPTOSIS                         | 158  | 0.531623 | 2.269902 | <0.001  |
| HALLMARK_COAGULATION                       | 135  | 0.636102 | 2.236989 | <0.001  |
| HALLMARK_ALLOGRAFT_REJECTION               | 191  | 0.72233  | 2.181941 | <0.001  |
| HALLMARK_IL6_JAK_STAT3_SIGNALING           | 83   | 0.691988 | 2.176086 | <0.001  |
| HALLMARK_P53_PATHWAY                       | 199  | 0.512236 | 2.162432 | <0.001  |
| HALLMARK_EPITHELIAL_MESENCHYMAL_TRANSITION | 195  | 0.713427 | 2.158405 | <0.001  |
| HALLMARK_HYPOXIA                           | 196  | 0.51047  | 2.006642 | <0.001  |
| HALLMARK_ANGIOGENESIS                      | 36   | 0.661551 | 1.999856 | <0.001  |
| HALLMARK_NOTCH_SIGNALING                   | 32   | 0.587456 | 1.967395 | <0.001  |
| HALLMARK_UV_RESPONSE_DN                    | 142  | 0.514739 | 1.88418  | <0.001  |
| HALLMARK_MYOGENESIS                        | 199  | 0.579657 | 1.879561 | <0.001  |
| HALLMARK_KRAS_SIGNALING_DN                 | 192  | 0.459638 | 1.755702 | <0.001  |
| HALLMARK_XENOBIOTIC_METABOLISM             | 199  | 0.441781 | 1.773818 | 0.001   |
| HALLMARK_TGF_BETA_SIGNALING                | 54   | 0.539635 | 1.826941 | 0.004   |
| HALLMARK_APICAL_SURFACE                    | 44   | 0.491586 | 1.755079 | 0.004   |
| HALLMARK_WNT_BETA_CATENIN_SIGNALING        | 42   | 0.509669 | 1.750261 | 0.009   |
| HALLMARK_ADIPOGENESIS                      | 195  | 0.43348  | 1.760053 | 0.010   |
| HALLMARK_INTERFERON_GAMMA_RESPONSE         | 192  | 0.650129 | 1.951214 | 0.011   |
| HALLMARK_CHOLESTEROL_HOMEOSTASIS           | 73   | 0.46569  | 1.683062 | 0.015   |

ER<sup>+</sup>, estrogen receptor-positive; ES, enrichment score; NES, normalized enrichment score.

Table SV. Hallmark gene sets enriched in the BMP6 low ER<sup>+</sup> tumors.

| NAME                               | SIZE | ES       | NES      | P-value |
|------------------------------------|------|----------|----------|---------|
| HALLMARK_E2F_TARGETS               | 197  | -0.67545 | -1.91366 | 0.008   |
| HALLMARK_G2M_CHECKPOINT            | 196  | -0.60042 | -1.80707 | 0.019   |
| HALLMARK_UNFOLDED_PROTEIN_RESPONSE | 109  | -0.43187 | -1.67543 | 0.024   |
| HALLMARK_MYC_TARGETS_V1            | 199  | -0.56131 | -1.72977 | 0.031   |

ER<sup>+</sup>, estrogen receptor-positive; ES, enrichment score; NES, normalized enrichment score.



Table SVI. Hallmark gene sets enriched in the BMP6 high ER<sup>-</sup> tumors.

| NAME                    | SIZE | ES       | NES      | P-value |
|-------------------------|------|----------|----------|---------|
| HALLMARK_MYC_TARGETS_V2 | 58   | 0.616632 | 1.713357 | 0.041   |

ER<sup>-</sup>, estrogen receptor-negative; ES, enrichment score; NES, normalized enrichment score.

Table SVII. Hallmark gene sets enriched in the BMP6 low ER<sup>-</sup> tumors.

| NAME                             | SIZE | ES       | NES      | P-value |
|----------------------------------|------|----------|----------|---------|
| HALLMARK_PI3K_AKT_MTOR_SIGNALING | 105  | -0.44702 | -1.75764 | <0.001  |
| HALLMARK_BILE_ACID_METABOLISM    | 112  | -0.48538 | -1.5936  | 0.007   |
| HALLMARK_XENOBIOTIC_METABOLISM   | 199  | -0.46769 | -1.54509 | 0.011   |
| HALLMARK_PEROXISOME              | 102  | -0.42292 | -1.52831 | 0.027   |
| HALLMARK_COAGULATION             | 135  | -0.47871 | -1.45814 | 0.041   |
| HALLMARK_COMPLEMENT              | 194  | -0.46668 | -1.59476 | 0.041   |
| HALLMARK_APOPTOSIS               | 158  | -0.39287 | -1.46413 | 0.047   |

ER<sup>-</sup>, estrogen receptor-negative; ES, enrichment score; NES, normalized enrichment score.
